# Supplementary material for: Cationic dextrin nanoparticles for effective intracellular delivery of cytochrome C in cancer therapy
Source: Royal Society of Chemistry journal article supplement (doi:10.1039/d3cb00090g), 2023-11-24
Supplement: d3cb00090g1.pdf [file d3cb00090g1.pdf]

*Electronic Supplementary Information*

**Cationic Dextrin Nanoparticles for Effective Intracellular Delivery of Cytochrome C in  
Cancer Therapy**

Ankita Sarkar, Sanchita Sarkhel, Deepali Bisht, Amit Jaiswal\*

*School of Biosciences and Bioengineering, Indian Institute of Technology Mandi, Kamand,  
Mandi, 175075 Himachal Pradesh, India*

\* Corresponding Author Email: [j.amit@iitmandi.ac.in](mailto:j.amit@iitmandi.ac.in)

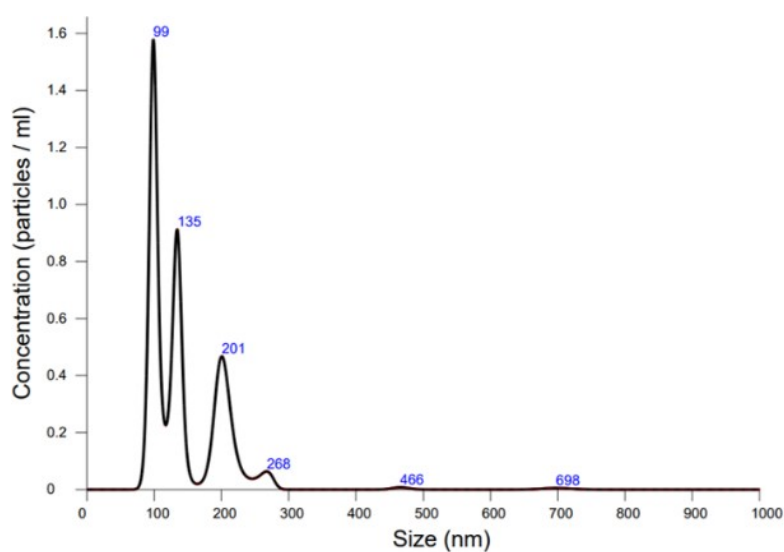

**Figure S1:** NTA analysis of CD NPs

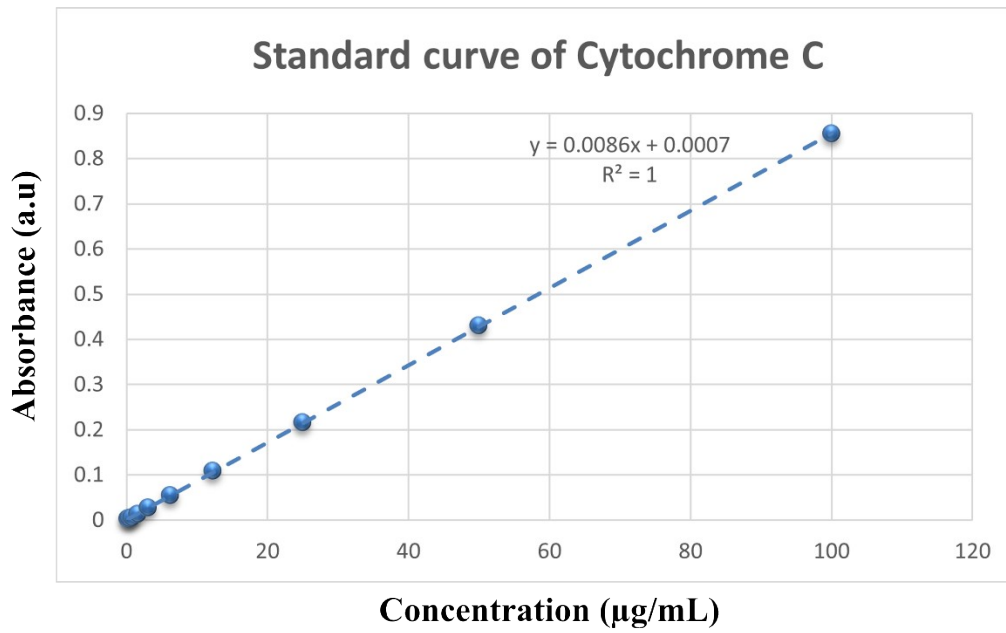

**Figure S2:** Standard curve plot of Cytochrome C.

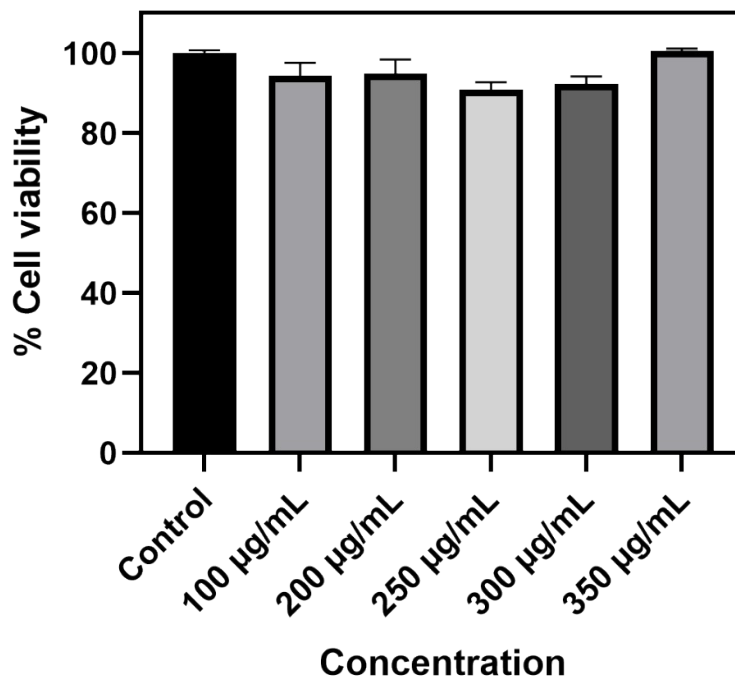

**Figure S3:** Cell viability assay of HeLa cells treated with Cyt C and chloroquine (0.1 mM).

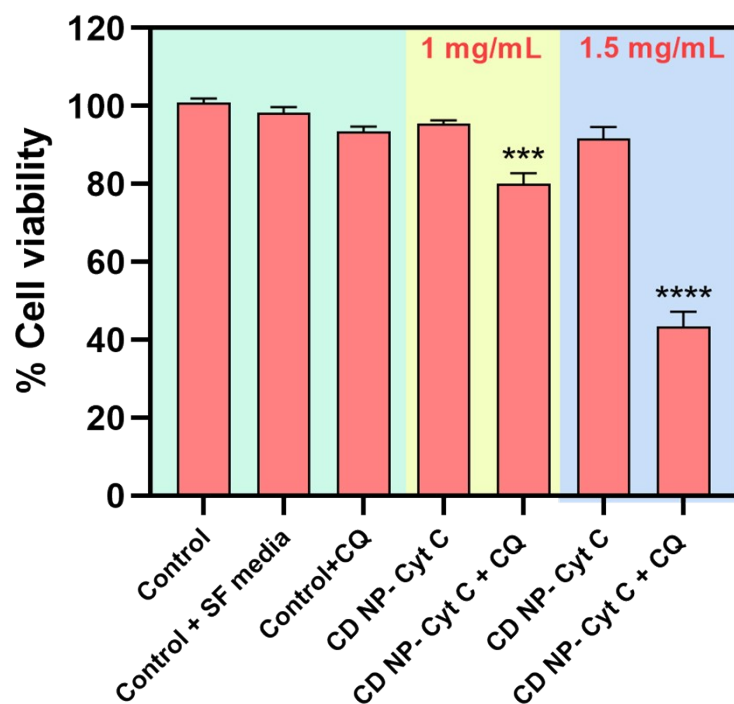

**Figure S4:** *In vitro* cell viability assay of A549 cells treated with different concentration of Cyt C- loaded CD NPs with and without chloroquine. Data is represented as mean  $\pm$  SD (\*\* $p < 0.01$ , \*\*\* $p < 0.001$ , and \*\*\*\* $p < 0.0001$ )
